# Supplementary material for: Synthesis of zeolite from multilayer food packing and sugar cane bagasse ash for CO2 adsorption
Source: Royal Society of Chemistry journal article supplement (doi:10.1039/c4ra04513k), 2014-01-01
Supplement: c4ra04513k1.pdf [file c4ra04513k1.pdf]

## Supplementary Information

Description of adsorption models and equations:

To clearly describe the CO<sub>2</sub> adsorption behavior on the synthesized zeolite, the Toth, Freundlich, and Langmuir models were used to fit the isotherm using the software Origin 7.0®.

The Toth isotherm model is a three-parameter equation derived from the Langmuir equation. This model assumes a quasi-Gaussian energy distribution and is a successful isotherm representing the adsorption of gases at both low and high pressure on heterogeneous surfaces.<sup>31</sup> This model was chosen because it takes the energetic heterogeneity of the active sites of sorbent and is represented in Equation 2<sup>32</sup>:

$$q = q_m \frac{bp}{(1 + (bp)^n)^{1/n}} \quad (2)$$

where  $q_m$  is the maximum adsorbed amount (mmol/g),  $b$  is the Toth constant (bar<sup>-1</sup>),  $p$  is the pressure (bar), and  $n$  indicates the heterogeneity of the active sites of the sorbent. The expression reduces to the Langmuir adsorption isotherm when  $n=1$ .

The Freundlich isotherm model was the earliest known equation describing the adsorption process. It is an empirical equation used for non-ideal sorption that involves heterogeneous sorption. The Freundlich isotherm is commonly given by the nonlinear Equation 3:

$$q = kp^{\frac{1}{n}} \quad (3)$$

where  $q$  is the adsorbed amount (mmol/g),  $K$  and  $n$  are constants for a given adsorbate and adsorbent at a particular temperature, and  $n$  represents the heterogeneity factor, becoming more heterogeneous as its value gets further from one.<sup>33</sup>

The Langmuir model, originally developed for the adsorption of gases into solids, assumes that adsorption occurs in a monolayer or that adsorption may only occur at a fixed number of localized sites on the surface with all adsorption sites identical and energetically equivalent. Therefore, the Langmuir equation is based on the assumption of a structurally homogeneous adsorbent. The model can be represented as follows<sup>34</sup>:

$$q = q_m \frac{bp}{1 + bp} \quad (4)$$

where  $q$  (mmol/g) is the adsorbed amount in equilibrium with the gas phase,  $q_m$  (mmol/g) is the maximum adsorbed amount,  $p$  is the equilibrium pressure of the gas phase, and  $b$  is the Langmuir affinity constant.
